# Supplementary material for: Marine ice sheet instability and ice shelf buttressing of the Minch Ice Stream, northwest Scotland
Source: Copernicus journal article supplement (doi:10.5194/tc-12-3635-2018), 2018-11-23
Supplement: Supplementary file 1 [file tc-12-3635-2018-supplement.zip]

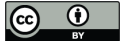

*Supplement of*

**Marine ice sheet instability and ice shelf buttressing of the Minch Ice Stream, northwest Scotland**

**Niall Gandy et al.**

*Correspondence to:* Niall Gandy (eeng@leeds.ac.uk)

- tc-12-3635-2018-supplement-title-page.pdf
- supplement
  - Minch\_retreat.mp4

The copyright of individual parts of the supplement might differ from the CC BY 4.0 License.
