# Supplementary material for: Marine ice sheet instability and ice shelf buttressing of the Minch Ice Stream, northwest Scotland
Source: Copernicus journal article supplement (doi:10.5194/tc-12-3635-2018), 2018-11-23
Supplement: Supplementary file 2 [file tc-12-3635-2018-supplement.zip]

Archive with 3 entries (2 files):
- tc-12-3635-2018-supplement-title-page.pdf
- supplement/
- supplement/Minch_retreat.mp4
